# Supplementary material for: The prion-like RNA-processing protein HNRPDL forms inherently toxic amyloid-like inclusion bodies in bacteria
Source: PubMed Central journal article supplement (PMC4498515; doi:10.1186/s12934-015-0284-7), 2015-07-11

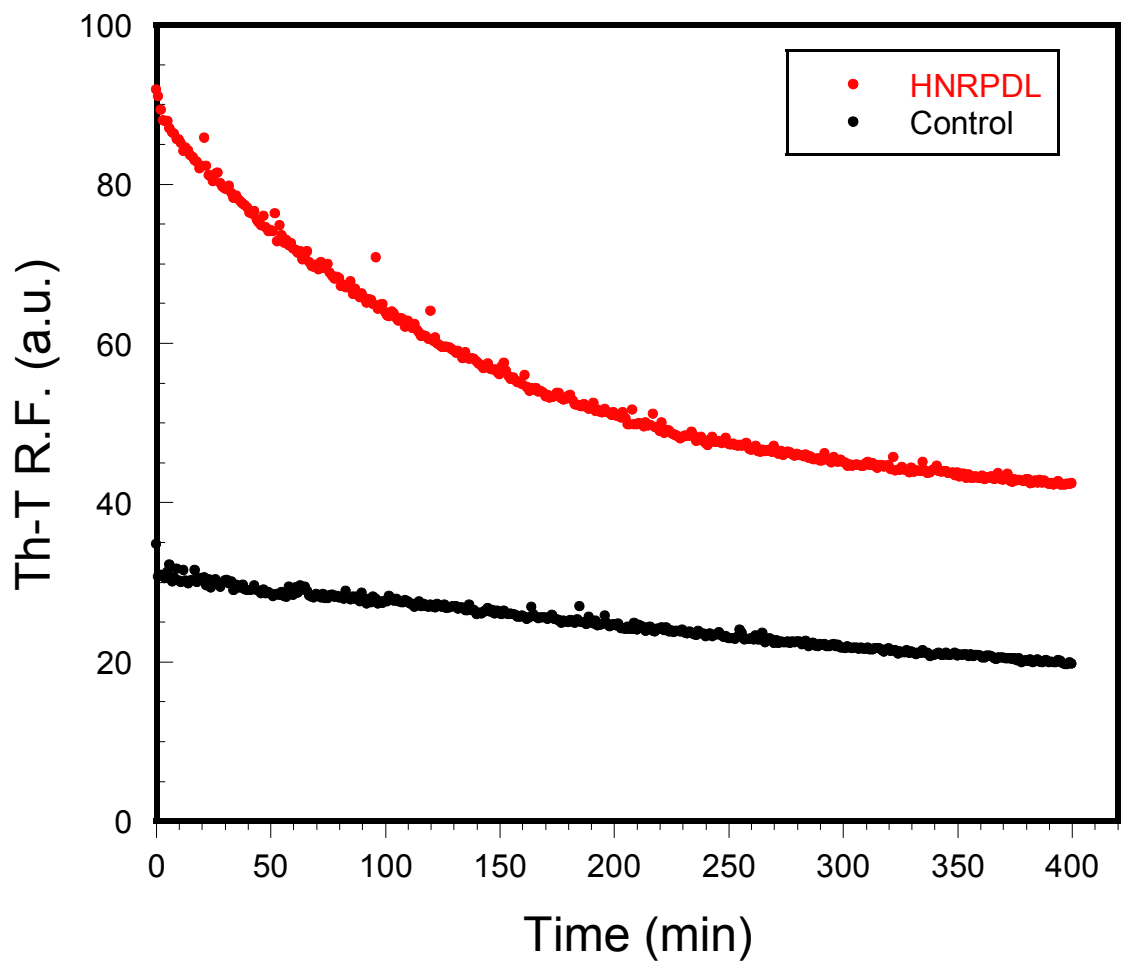

Supplement: 12934_2015_284_MOESM3_ESM.pdf [file 12934_2015_284_MOESM3_ESM.pdf]
